# Supplementary material for: Association of Genetic Polymorphisms and Serum Levels of miR-1-3p with Postoperative Mortality following Abdominal Aortic Aneurysm Repair
Source: MDPI journal article supplement (doi:10.3390/jcm12030946), 2023-01-26
Supplement: s1 [file s1]

**Table S1.** Univariate Cox regression analysis for the prognostic impact of clinical features on all-cause mortality after AAA repair.

| Variable                                         | <i>p</i> value | HR (95% CI)         |
|--------------------------------------------------|----------------|---------------------|
| Age                                              | <0.001         | 1.057 (1.026-1.088) |
| Male sex                                         | 0.497          | 1.280 (0.628-2.609) |
| Smoking                                          | 0.363          | 1.275 (0.755-2.151) |
| Drinking                                         | 0.386          | 0.718 (0.340-1.517) |
| BMI                                              | 0.258          | 0.953 (0.878-1.036) |
| Comorbidities                                    |                |                     |
| Coronary artery disease                          | 0.769          | 1.100 (0.582-2.080) |
| Cerebrovascular disease                          | 0.128          | 1.700 (0.859-3.364) |
| Peripheral artery disease                        | 0.367          | 1.305 (0.732-2.325) |
| Renal insufficiency                              | 0.001          | 2.695 (1.494-4.863) |
| Atrial fibrillation                              | 0.552          | 1.361 (0.493-3.762) |
| Hypertension                                     | 0.174          | 1.505 (0.834-2.713) |
| Diabetes                                         | 0.109          | 1.692 (0.889-3.220) |
| Dyslipidemia                                     | 0.810          | 1.076 (0.592-1.955) |
| Maximum AAA diameter                             | 0.014          | 1.155 (1.029-1.295) |
| Presence of surgical complications               | 0.043          | 1.933 (1.022-3.656) |
| Presence of postoperative renal dysfunction      | 0.083          | 2.116 (0.908-4.933) |
| Presence of postoperative respiratory impairment | 0.197          | 1.683 (0.763-3.712) |
| Presence of reoperation                          | 0.778          | 1.114 (0.527-2.352) |
| Surgical type                                    | 0.310          | 0.679 (0.321-1.434) |

BMI: body mass index; AAA: abdominal aortic aneurysm; HR: hazard ratio; CI: confidence interval.
